# Supplementary material for: Global Comparison of Changes in the Number of Test-Positive Cases and Deaths by Coronavirus Infection (COVID-19) in the World
Source: Preprints.org preprint supplement (doi:10.20944/preprints202004.0374.v2), 2020-06-03
Supplement: Supplementary file 1 [file AnalysisOfCOVID-19_Hisaka.xlsx]

## Sheet: Test-Positive Cases
Number of test-positive cases downloaded from ECDC
date	China(main)	Korea	Japan	Cruse ship	Singapore	Thailand	Vietnam	Philippine	Malaysia	Indonesia	Pakistan	Taiwan	India	Israel	Iran	Saudi_Arabia	Turkey	Austraria	Italy	France	Germany	Czech_Republic	Romania	Spain	Portugal	Netherlands	Austria	Poland	Belgium	Luxembourg	Sweden	Norway	Finland	Denmark	Switzerland	Greece	United Kingdom	Ireland	Iceland	Russia	US	Canada	Mexico	Ecuador	Chile	Panama	Brazil	Argentina	Peru
2019-12-31	27	0	0	0	0	0	0	0	0	0	0	0	0	0	0	0	0	0	0	0	0	0	0	0	0	0	0	0	0	0	0	0	0	0	0	0	0	0	0	0	0	0	0	0	0	0	0	0	0
2020-01-01	0	0	0	0	0	0	0	0	0	0	0	0	0	0	0	0	0	0	0	0	0	0	0	0	0	0	0	0	0	0	0	0	0	0	0	0	0	0	0	0	0	0	0	0	0	0	0	0	0
2020-01-02	0	0	0	0	0	0	0	0	0	0	0	0	0	0	0	0	0	0	0	0	0	0	0	0	0	0	0	0	0	0	0	0	0	0	0	0	0	0	0	0	0	0	0	0	0	0	0	0	0
2020-01-03	17	0	0	0	0	0	0	0	0	0	0	0	0	0	0	0	0	0	0	0	0	0	0	0	0	0	0	0	0	0	0	0	0	0	0	0	0	0	0	0	0	0	0	0	0	0	0	0	0
2020-01-04	0	0	0	0	0	0	0	0	0	0	0	0	0	0	0	0	0	0	0	0	0	0	0	0	0	0	0	0	0	0	0	0	0	0	0	0	0	0	0	0	0	0	0	0	0	0	0	0	0
2020-01-05	15	0	0	0	0	0	0	0	0	0	0	0	0	0	0	0	0	0	0	0	0	0	0	0	0	0	0	0	0	0	0	0	0	0	0	0	0	0	0	0	0	0	0	0	0	0	0	0	0
2020-01-06	0	0	0	0	0	0	0	0	0	0	0	0	0	0	0	0	0	0	0	0	0	0	0	0	0	0	0	0	0	0	0	0	0	0	0	0	0	0	0	0	0	0	0	0	0	0	0	0	0
2020-01-07	0	0	0	0	0	0	0	0	0	0	0	0	0	0	0	0	0	0	0	0	0	0	0	0	0	0	0	0	0	0	0	0	0	0	0	0	0	0	0	0	0	0	0	0	0	0	0	0	0
2020-01-08	0	0	0	0	0	0	0	0	0	0	0	0	0	0	0	0	0	0	0	0	0	0	0	0	0	0	0	0	0	0	0	0	0	0	0	0	0	0	0	0	0	0	0	0	0	0	0	0	0
2020-01-09	0	0	0	0	0	0	0	0	0	0	0	0	0	0	0	0	0	0	0	0	0	0	0	0	0	0	0	0	0	0	0	0	0	0	0	0	0	0	0	0	0	0	0	0	0	0	0	0	0
2020-01-10	0	0	0	0	0	0	0	0	0	0	0	0	0	0	0	0	0	0	0	0	0	0	0	0	0	0	0	0	0	0	0	0	0	0	0	0	0	0	0	0	0	0	0	0	0	0	0	0	0
2020-01-11	0	0	0	0	0	0	0	0	0	0	0	0	0	0	0	0	0	0	0	0	0	0	0	0	0	0	0	0	0	0	0	0	0	0	0	0	0	0	0	0	0	0	0	0	0	0	0	0	0
2020-01-12	0	0	0	0	0	0	0	0	0	0	0	0	0	0	0	0	0	0	0	0	0	0	0	0	0	0	0	0	0	0	0	0	0	0	0	0	0	0	0	0	0	0	0	0	0	0	0	0	0
2020-01-13	0	0	0	0	0	1	0	0	0	0	0	0	0	0	0	0	0	0	0	0	0	0	0	0	0	0	0	0	0	0	0	0	0	0	0	0	0	0	0	0	0	0	0	0	0	0	0	0	0
2020-01-14	0	0	0	0	0	0	0	0	0	0	0	0	0	0	0	0	0	0	0	0	0	0	0	0	0	0	0	0	0	0	0	0	0	0	0	0	0	0	0	0	0	0	0	0	0	0	0	0	0
2020-01-15	0	0	1	0	0	0	0	0	0	0	0	0	0	0	0	0	0	0	0	0	0	0	0	0	0	0	0	0	0	0	0	0	0	0	0	0	0	0	0	0	0	0	0	0	0	0	0	0	0
2020-01-16	0	0	0	0	0	0	0	0	0	0	0	0	0	0	0	0	0	0	0	0	0	0	0	0	0	0	0	0	0	0	0	0	0	0	0	0	0	0	0	0	0	0	0	0	0	0	0	0	0
2020-01-17	4	0	0	0	0	1	0	0	0	0	0	0	0	0	0	0	0	0	0	0	0	0	0	0	0	0	0	0	0	0	0	0	0	0	0	0	0	0	0	0	0	0	0	0	0	0	0	0	0
2020-01-18	17	0	0	0	0	0	0	0	0	0	0	0	0	0	0	0	0	0	0	0	0	0	0	0	0	0	0	0	0	0	0	0	0	0	0	0	0	0	0	0	0	0	0	0	0	0	0	0	0
2020-01-19	136	0	0	0	0	0	0	0	0	0	0	0	0	0	0	0	0	0	0	0	0	0	0	0	0	0	0	0	0	0	0	0	0	0	0	0	0	0	0	0	0	0	0	0	0	0	0	0	0
2020-01-20	19	1	0	0	0	0	0	0	0	0	0	0	0	0	0	0	0	0	0	0	0	0	0	0	0	0	0	0	0	0	0	0	0	0	0	0	0	0	0	0	0	0	0	0	0	0	0	0	0
2020-01-21	151	0	0	0	0	0	0	0	0	0	0	1	0	0	0	0	0	0	0	0	0	0	0	0	0	0	0	0	0	0	0	0	0	0	0	0	0	0	0	0	1	0	0	0	0	0	0	0	0
2020-01-22	140	0	0	0	0	2	0	0	0	0	0	0	0	0	0	0	0	0	0	0	0	0	0	0	0	0	0	0	0	0	0	0	0	0	0	0	0	0	0	0	0	0	0	0	0	0	0	0	0
2020-01-23	97	0	0	0	0	0	0	0	0	0	0	0	0	0	0	0	0	0	0	0	0	0	0	0	0	0	0	0	0	0	0	0	0	0	0	0	0	0	0	0	0	0	0	0	0	0	0	0	0
2020-01-24	259	1	1	0	3	0	2	0	0	0	0	0	0	0	0	0	0	0	0	0	0	0	0	0	0	0	0	0	0	0	0	0	0	0	0	0	0	0	0	0	0	0	0	0	0	0	0	0	0
2020-01-25	441	0	0	0	0	1	0	0	3	0	0	2	0	0	0	0	0	1	0	3	0	0	0	0	0	0	0	0	0	0	0	0	0	0	0	0	0	0	0	0	1	0	0	0	0	0	0	0	0
2020-01-26	665	1	1	0	1	0	0	0	1	0	0	0	0	0	0	0	0	3	0	0	0	0	0	0	0	0	0	0	0	0	0	0	0	0	0	0	0	0	0	0	0	1	0	0	0	0	0	0	0
2020-01-27	787	1	0	0	0	3	0	0	0	0	0	2	0	0	0	0	0	0	0	0	0	0	0	0	0	0	0	0	0	0	0	0	0	0	0	0	0	0	0	0	3	0	0	0	0	0	0	0	0
2020-01-28	1753	0	1	0	1	6	0	0	0	0	0	2	0	0	0	0	0	0	0	0	1	0	0	0	0	0	0	0	0	0	0	0	0	0	0	0	0	0	0	0	0	1	0	0	0	0	0	0	0
2020-01-29	1466	0	3	0	2	0	0	0	3	0	0	1	0	0	0	0	0	0	0	1	3	0	0	0	0	0	0	0	0	0	0	0	0	0	0	0	0	0	0	0	0	1	0	0	0	0	0	0	0
2020-01-30	1740	0	4	0	3	0	0	1	0	0	0	0	1	0	0	0	0	2	0	1	0	0	0	0	0	0	0	0	0	0	0	0	1	0	0	0	0	0	0	0	0	0	0	0	0	0	0	0	0
2020-01-31	1980	3	3	0	3	0	3	0	1	0	0	1	0	0	0	0	0	1	3	1	1	0	0	0	0	0	0	0	0	0	0	0	0	0	0	0	2	0	0	0	1	0	0	0	0	0	0	0	0
2020-02-01	2095	5	1	0	3	5	0	0	0	0	0	1	0	0	0	0	0	2	0	0	2	0	0	1	0	0	0	0	0	0	1	0	0	0	0	0	0	0	0	2	1	1	0	0	0	0	0	0	0
2020-02-02	2590	3	4	0	2	0	2	1	0	0	0	0	1	0	0	0	0	2	0	0	1	0	0	0	0	0	0	0	0	0	0	0	0	0	0	0	0	0	0	0	1	0	0	0	0	0	0	0	0
2020-02-03	2812	0	1	0	0	0	1	0	0	0	0	0	0	0	0	0	0	0	0	0	1	0	0	0	0	0	0	0	0	0	0	0	0	0	0	0	0	0	0	0	3	0	0	0	0	0	0	0	0
2020-02-04	3237	1	0	0	0	0	1	0	0	0	0	0	1	0	0	0	0	0	0	0	2	0	0	0	0	0	0	0	1	0	0	0	0	0	0	0	0	0	0	0	0	0	0	0	0	0	0	0	0
2020-02-05	3872	2	5	10	6	6	1	0	2	0	0	1	0	0	0	0	0	1	0	0	0	0	0	0	0	0	0	0	0	0	0	0	0	0	0	0	0	0	0	0	0	1	0	0	0	0	0	0	0
2020-02-06	3727	5	0	10	4	0	0	1	2	0	0	0	0	0	0	0	0	1	0	0	0	0	0	0	0	0	0	0	0	0	0	0	0	0	0	0	0	0	0	0	1	0	0	0	0	0	0	0	0
2020-02-07	3160	1	0	41	2	0	2	0	2	0	0	5	0	0	0	0	0	1	0	0	1	0	0	0	0	0	0	0	0	0	0	0	0	0	0	0	1	0	0	0	0	2	0	0	0	0	0	0	0
2020-02-08	3418	0	0	3	3	7	1	0	1	0	0	1	0	0	0	0	0	0	0	5	1	0	0	0	0	0	0	0	0	0	0	0	0	0	0	0	0	0	0	0	0	0	0	0	0	0	0	0	0
2020-02-09	2607	1	0	0	7	0	1	0	1	0	0	1	0	0	0	0	0	0	0	0	0	0	0	0	0	0	0	0	0	0	0	0	0	0	0	0	1	0	0	0	0	0	0	0	0	0	0	0	0
2020-02-10	2974	2	0	6	3	0	0	0	2	0	0	0	0	0	0	0	0	0	0	0	0	0	0	1	0	0	0	0	0	0	0	0	0	0	0	0	0	0	0	0	0	0	0	0	0	0	0	0	0
2020-02-11	2490	1	0	65	2	0	1	0	0	0	0	0	0	0	0	0	0	0	0	0	0	0	0	0	0	0	0	0	0	0	0	0	0	0	0	0	4	0	0	0	1	0	0	0	0	0	0	0	0
2020-02-12	2028	0	0	39	2	1	0	0	0	0	0	0	0	0	0	0	0	0	0	0	2	0	0	0	0	0	0	0	0	0	0	0	0	0	0	0	0	0	0	0	0	0	0	0	0	0	0	0	0
2020-02-13	15141	0	4	0	3	0	1	0	0	0	0	0	0	0	0	0	0	0	0	0	0	0	0	0	0	0	0	0	0	0	0	0	0	0	0	0	1	0	0	0	1	0	0	0	0	0	0	0	0
2020-02-14	4156	0	1	47	8	0	0	0	1	0	0	0	0	0	0	0	0	1	0	0	0	0	0	0	0	0	0	0	0	0	0	0	0	0	0	0	0	0	0	0	1	0	0	0	0	0	0	0	0
2020-02-15	2538	0	8	0	9	1	0	0	2	0	0	0	0	0	0	0	0	0	0	0	0	0	0	0	0	0	0	0	0	0	0	0	0	0	0	0	0	0	0	0	0	1	0	0	0	0	0	0	0
2020-02-16	2007	1	14	134	5	0	0	0	1	0	0	0	0	0	0	0	0	0	0	0	0	0	0	0	0	0	0	0	0	0	0	0	0	0	0	0	0	0	0	0	0	0	0	0	0	0	0	0	0
2020-02-17	2052	1	7	0	3	0	0	0	0	0	0	2	0	0	0	0	0	0	0	1	0	0	0	0	0	0	0	0	0	0	0	0	0	0	0	0	0	0	0	0	0	0	0	0	0	0	0	0	0
2020-02-18	1890	1	0	99	2	1	0	0	0	0	0	2	0	0	0	0	0	0	0	0	0	0	0	0	0	0	0	0	0	0	0	0	0	0	0	0	0	0	0	0	0	0	0	0	0	0	0	0	0
2020-02-19	1750	15	7	88	4	0	0	0	0	0	0	0	0	0	0	0	0	0	0	0	0	0	0	0	0	0	0	0	0	0	0	0	0	0	0	0	0	0	0	0	0	0	0	0	0	0	0	0	0
2020-02-20	394	34	18	79	3	0	0	0	0	0	0	2	0	0	2	0	0	0	0	0	0	0	0	0	0	0	0	0	0	0	0	0	0	0	0	0	0	0	0	0	0	0	0	0	0	0	0	0	0
2020-02-21	891	75	9	13	1	0	0	0	0	0	0	0	0	0	3	0	0	2	0	0	0	0	0	0	0	0	0	0	0	0	0	0	0	0	0	0	0	0	0	0	1	1	0	0	0	0	0	0	0
2020-02-22	826	190	12	0	1	0	0	0	0	0	0	2	0	1	13	0	0	4	14	0	0	0	0	0	0	0	0	0	0	0	0	0	0	0	0	0	0	0	0	0	19	0	0	0	0	0	0	0	0
2020-02-23	647	256	27	0	3	0	0	0	0	0	0	0	0	0	10	0	0	1	62	0	0	0	0	0	0	0	0	0	0	0	0	0	0	0	0	0	0	0	0	0	0	0	0	0	0	0	0	0	0
2020-02-24	218	161	12	57	0	0	0	0	0	0	0	2	0	1	15	0	0	0	53	0	0	0	0	0	0	0	0	0	0	0	0	0	0	0	0	0	4	0	0	0	0	0	0	0	0	0	0	0	0
2020-02-25	515	130	0	0	1	2	0	0	0	0	0	2	0	0	18	0	0	0	97	0	0	0	0	1	0	0	0	0	0	0	0	0	0	0	0	0	0	0	0	0	18	2	0	0	0	0	0	0	0
2020-02-26	410	254	20	0	1	3	0	0	0	0	0	1	0	0	34	0	0	0	93	2	2	0	0	4	0	0	2	0	0	0	0	0	0	0	1	0	0	0	0	0	0	0	0	0	0	0	1	0	0
2020-02-27	439	449	22	14	2	0	0	0	0	0	2	1	0	0	44	0	0	1	78	3	4	0	1	5	0	0	0	0	0	0	1	1	1	1	0	1	0	0	0	0	6	1	0	0	0	0	0	0	0
2020-02-28	329	427	24	0	3	0	0	0	1	0	0	2	0	1	106	0	0	0	250	21	26	0	0	13	0	1	3	0	0	0	5	3	0	0	7	2	3	0	0	0	1	2	0	0	0	0	0	0	0
2020-02-29	428	909	20	0	2	2	0	0	2	0	0	5	0	4	143	0	0	2	238	19	10	0	2	9	0	1	2	0	0	0	5	2	1	1	4	1	2	0	1	0	6	2	2	0	0	0	0	0	0
2020-03-01	574	595	9	0	4	0	0	0	0	0	2	1	0	0	205	0	0	1	240	43	54	0	0	32	0	5	3	0	0	1	1	9	0	1	6	3	5	1	0	0	3	4	2	1	0	0	1	0	0
2020-03-02	205	686	15	0	4	1	0	0	4	2	0	0	0	3	385	0	0	3	561	30	18	3	0	17	0	6	4	0	1	0	1	4	3	1	6	0	13	0	2	0	20	4	1	5	0	0	0	0	0
2020-03-03	127	600	0	0	2	0	0	0	7	0	0	1	2	0	523	1	0	4	146	48	28	2	1	31	2	5	4	0	6	0	1	6	0	1	6	0	4	0	3	1	14	3	0	1	0	0	0	0	0
2020-03-04	119	516	14	0	2	0	0	0	0	0	1	1	1	0	835	0	0	8	667	34	39	0	0	37	2	10	6	1	5	0	9	8	1	3	7	0	11	1	10	1	22	3	0	0	1	0	0	1	0
2020-03-05	117	438	49	0	2	4	0	0	14	0	0	0	22	5	586	0	0	11	587	73	66	3	2	49	1	10	5	0	10	0	11	23	0	2	20	3	34	4	10	0	34	3	0	3	2	0	1	0	0
2020-03-06	170	518	32	0	5	0	0	0	0	0	0	2	1	2	591	4	0	7	769	138	138	4	0	61	4	44	12	0	27	0	26	30	5	10	30	22	30	7	9	0	74	12	0	3	1	0	5	1	0
2020-03-07	101	483	59	0	13	3	1	2	33	2	1	1	2	2	1234	0	0	4	778	190	284	7	1	113	4	46	33	4	59	2	76	27	7	3	122	13	48	5	8	6	105	6	0	0	1	0	5	6	1
2020-03-08	46	367	47	0	8	0	4	1	10	0	0	0	0	6	1076	2	0	11	1247	103	163	7	6	56	8	60	25	1	60	0	24	34	0	8	55	21	43	1	10	0	95	6	0	0	0	0	0	1	0
2020-03-09	45	248	33	0	12	0	9	4	6	2	0	0	3	14	743	4	0	6	1492	410	55	6	2	159	9	77	3	5	31	2	42	22	11	7	68	7	67	2	2	0	121	5	2	1	5	0	12	3	6
2020-03-10	20	131	26	-9	10	0	1	23	18	0	10	0	10	0	595	4	0	20	1797	286	237	8	2	615	9	56	29	6	39	0	45	23	10	75	42	11	48	0	10	0	200	15	0	1	3	1	0	0	2
2020-03-11	29	242	54	0	6	9	4	0	12	13	0	3	6	31	881	5	0	12	977	372	157	23	8	435	2	61	51	5	28	2	78	85	0	151	116	6	52	14	5	0	271	16	0	2	4	6	9	7	2
2020-03-12	24	114	51	0	12	11	4	16	20	15	4	0	23	12	958	25	1	14	2313	497	271	31	20	501	18	121	64	9	47	0	136	212	19	252	152	9	83	8	15	15	287	10	4	0	6	7	18	0	6
2020-03-13	22	110	56	0	9	0	5	3	9	0	1	1	2	14	1075	17	1	30	2651	595	802	22	19	864	19	111	115	18	85	19	158	132	96	160	212	34	134	27	32	5	351	35	5	0	10	13	25	12	5
2020-03-14	19	107	62	0	13	12	5	12	39	35	0	4	8	20	1289	24	0	41	2547	785	693	34	25	1227	34	190	143	19	160	12	155	0	0	128	267	57	117	21	0	15	511	38	10	6	10	9	21	3	16
2020-03-15	22	76	43	0	14	0	4	47	41	27	9	6	7	62	1365	0	0	52	90	838	733	64	24	1522	57	155	151	36	130	39	149	286	55	23	238	38	433	38	21	14	777	68	15	5	18	7	23	11	5
2020-03-16	25	74	34	0	12	32	4	29	190	21	1	0	3	72	1209	32	16	49	6230	924	1043	84	26	2000	76	176	205	21	197	0	108	170	57	48	841	103	251	40	40	4	823	60	12	9	14	0	79	11	28
2020-03-17	110	84	10	0	17	63	4	2	125	17	156	8	32	10	1053	15	29	77	4000	1210	1174	46	45	1438	86	278	156	52	199	4	89	92	5	57	0	21	152	54	21	30	887	120	29	21	81	26	34	9	15
2020-03-18	33	93	5	0	23	0	0	45	120	38	0	10	12	167	1178	0	51	79	3526	1097	1144	90	33	1987	117	292	316	61	158	59	46	139	47	92	450	35	407	69	48	21	1766	145	11	53	45	17	57	14	31
2020-03-19	75	152	44	0	47	0	15	15	117	0	115	31	28	6	1192	38	93	111	4207	1404	1042	88	43	2538	194	346	314	49	243	70	134	115	50	91	360	31	680	74	3	33	2988	121	25	57	37	23	137	18	28
2020-03-20	99	87	77	0	32	35	9	28	110	55	176	0	26	244	1046	67	168	144	5322	1861	5940	172	17	3431	143	409	550	68	309	135	122	129	31	36	878	46	647	191	80	52	4835	156	46	31	104	28	193	31	89
2020-03-21	52	147	57	0	40	154	2	0	130	82	17	27	40	35	1237	36	311	165	5986	1617	4049	210	31	2833	235	534	453	70	462	139	200	190	50	104	952	31	706	126	79	54	5374	125	39	227	92	63	283	30	29
2020-03-22	65	98	39	0	47	233	7	150	153	141	151	18	89	171	966	118	277	224	6557	1847	3276	91	59	4946	260	637	375	111	558	186	123	184	71	71	1237	35	1035	102	64	53	7123	260	48	106	103	45	224	67	55
2020-03-23	138	64	43	0	23	122	24	0	123	64	138	12	119	188	1028	119	289	611	5560	1559	3311	170	66	3646	320	573	607	98	586	128	160	206	105	69	894	94	665	121	95	132	8459	199	65	257	95	68	418	41	45
2020-03-24	69	76	39	0	54	106	5	82	212	65	103	30	53	371	1411	51	293	114	4789	3838	4438	71	143	4517	460	545	855	115	342	77	110	239	74	65	1044	71	967	219	20	0	11236	216	51	192	114	32	345	35	32
2020-03-25	78	100	65	0	49	107	11	90	106	107	104	21	70	488	1762	205	343	600	5249	2446	2342	158	186	6584	302	811	796	152	526	224	256	195	92	131	774	48	1427	204	60	57	8789	313	38	101	176	98	310	86	21
2020-03-26	102	104	75	0	10	111	14	84	172	104	66	19	87	439	2206	133	561	376	5210	2931	4954	260	144	7937	633	852	606	150	668	234	238	350	88	133	925	78	1452	235	89	163	13963	1426	70	129	220	145	232	115	142
2020-03-27	94	91	96	0	26	91	5	71	235	103	140	17	75	297	2389	112	1196	367	6153	3922	5780	408	123	8578	549	1019	1141	170	1298	120	296	240	78	153	1000	71	2129	255	65	182	16797	633	110	192	164	86	482	87	22
2020-03-28	119	146	135	0	138	0	16	96	130	153	0	15	149	369	2926	92	2069	212	5959	3809	6294	217	263	7871	724	1172	668	168	1049	152	240	425	67	169	1390	74	2885	302	88	196	18695	671	132	224	304	112	502	101	55
2020-03-29	113	105	194	0	71	109	54	272	159	109	211	16	106	584	3076	99	1704	431	5974	4611	3965	384	160	8189	902	1159	594	249	1850	226	401	264	193	155	1048	95	2546	294	73	228	19979	697	131	208	299	115	487	55	36
2020-03-30	98	78	173	0	41	143	5	343	150	130	118	23	92	628	2901	26	1815	284	5217	2599	4751	166	308	6549	792	1104	522	224	1702	119	253	257	0	194	1122	95	2433	200	57	270	18360	869	145	55	230	88	352	75	181
2020-03-31	84	125	87	0	0	263	1	666	156	129	99	0	180	226	3186	224	2318	464	4050	4376	4615	173	192	6398	446	884	805	193	1063	38	328	124	95	182	1138	56	2619	295	66	302	21595	1169	101	76	310	86	323	146	98
2020-04-01	54	0	0	0	35	0	0	0	0	114	414	16	146	443	3111	110	1996	150	4053	7578	5453	306	293	9222	1035	845	564	256	876	190	407	221	71	283	696	102	3009	325	49	501	24998	1112	121	336	289	106	1138	0	115
2020-04-02	100	190	225	0	121	120	6	227	282	149	252	17	568	675	2987	157	2148	269	4782	4861	6156	281	215	7719	808	1019	529	243	1189	141	512	218	62	247	962	61	4324	212	85	440	27103	1059	163	456	293	136	1119	167	258
2020-04-03	70	86	439	0	49	104	4	322	208	113	0	0	336	661	2875	165	2456	248	4668	2116	0	269	278	8102	783	1083	418	392	1384	168	519	270	72	279	1774	139	4244	402	99	771	28819	1673	0	405	373	158	1074	0	91
2020-04-04	62	94	318	0	65	103	0	385	217	196	0	16	601	1176	0	0	2786	324	4585	5233	6174	332	445	7472	852	1026	396	437	1422	125	612	273	97	371	862	99	4450	424	45	601	32425	1251	310	205	333	198	1146	132	181
2020-04-05	48	81	336	0	75	191	1	76	150	106	159	8	472	590	5275	294	3013	139	4805	4267	12018	282	430	7026	638	904	241	244	1661	117	365	302	267	320	783	60	3735	331	53	582	34272	1363	202	97	424	128	1222	186	151
2020-04-06	67	47	383	0	120	51	1	152	179	181	827	0	693	412	2483	206	3135	57	4316	1873	3677	115	251	6023	754	1224	217	475	1260	75	387	130	45	292	821	62	5903	507	69	658	25398	1614	253	181	310	187	852	103	535
2020-04-07	56	47	163	0	66	38	4	414	131	218	587	10	354	474	2274	138	3148	100	3599	3912	3834	235	193	4273	452	952	314	311	1123	39	376	115	249	312	552	20	3802	253	76	954	30561	1157	296	101	344	112	926	74	280
2020-04-08	86	53	89	0	106	111	6	104	170	247	208	3	773	344	2089	272	3892	112	3039	3777	4003	195	360	5478	712	777	343	435	1380	127	487	108	132	390	590	77	3634	345	24	1154	30613	1230	346	248	301	149	1661	87	393
[truncated: 203 more columns]

## Sheet: Deaths
Number of daily deaths downloaded from ECDC
date	China(main)	Korea	Japan	Cruse ship	Singapore	Thailand	Vietnam	Philippine	Malaysia	Indonesia	Pakistan	Taiwan	India	Israel	Iran	Saudi_Arabia	Turkey	Austraria	Italy	France	Germany	Czech_Republic	Romania	Spain	Portugal	Netherlands	Austria	Poland	Belgium	Luxembourg	Sweden	Norway	Finland	Denmark	Switzerland	Greece	United Kingdom	Ireland	Iceland	Russia	US	Canada	Mexico	Ecuador	Chile	Panama	Brazil	Argentina	Peru
2019-12-31	0	0	0	0	0	0	0	0	0	0	0	0	0	0	0	0	0	0	0	0	0	0	0	0	0	0	0	0	0	0	0	0	0	0	0	0	0	0	0	0	0	0	0	0	0	0	0	0	0
2020-01-01	0	0	0	0	0	0	0	0	0	0	0	0	0	0	0	0	0	0	0	0	0	0	0	0	0	0	0	0	0	0	0	0	0	0	0	0	0	0	0	0	0	0	0	0	0	0	0	0	0
2020-01-02	0	0	0	0	0	0	0	0	0	0	0	0	0	0	0	0	0	0	0	0	0	0	0	0	0	0	0	0	0	0	0	0	0	0	0	0	0	0	0	0	0	0	0	0	0	0	0	0	0
2020-01-03	0	0	0	0	0	0	0	0	0	0	0	0	0	0	0	0	0	0	0	0	0	0	0	0	0	0	0	0	0	0	0	0	0	0	0	0	0	0	0	0	0	0	0	0	0	0	0	0	0
2020-01-04	0	0	0	0	0	0	0	0	0	0	0	0	0	0	0	0	0	0	0	0	0	0	0	0	0	0	0	0	0	0	0	0	0	0	0	0	0	0	0	0	0	0	0	0	0	0	0	0	0
2020-01-05	0	0	0	0	0	0	0	0	0	0	0	0	0	0	0	0	0	0	0	0	0	0	0	0	0	0	0	0	0	0	0	0	0	0	0	0	0	0	0	0	0	0	0	0	0	0	0	0	0
2020-01-06	0	0	0	0	0	0	0	0	0	0	0	0	0	0	0	0	0	0	0	0	0	0	0	0	0	0	0	0	0	0	0	0	0	0	0	0	0	0	0	0	0	0	0	0	0	0	0	0	0
2020-01-07	0	0	0	0	0	0	0	0	0	0	0	0	0	0	0	0	0	0	0	0	0	0	0	0	0	0	0	0	0	0	0	0	0	0	0	0	0	0	0	0	0	0	0	0	0	0	0	0	0
2020-01-08	0	0	0	0	0	0	0	0	0	0	0	0	0	0	0	0	0	0	0	0	0	0	0	0	0	0	0	0	0	0	0	0	0	0	0	0	0	0	0	0	0	0	0	0	0	0	0	0	0
2020-01-09	0	0	0	0	0	0	0	0	0	0	0	0	0	0	0	0	0	0	0	0	0	0	0	0	0	0	0	0	0	0	0	0	0	0	0	0	0	0	0	0	0	0	0	0	0	0	0	0	0
2020-01-10	0	0	0	0	0	0	0	0	0	0	0	0	0	0	0	0	0	0	0	0	0	0	0	0	0	0	0	0	0	0	0	0	0	0	0	0	0	0	0	0	0	0	0	0	0	0	0	0	0
2020-01-11	1	0	0	0	0	0	0	0	0	0	0	0	0	0	0	0	0	0	0	0	0	0	0	0	0	0	0	0	0	0	0	0	0	0	0	0	0	0	0	0	0	0	0	0	0	0	0	0	0
2020-01-12	0	0	0	0	0	0	0	0	0	0	0	0	0	0	0	0	0	0	0	0	0	0	0	0	0	0	0	0	0	0	0	0	0	0	0	0	0	0	0	0	0	0	0	0	0	0	0	0	0
2020-01-13	0	0	0	0	0	0	0	0	0	0	0	0	0	0	0	0	0	0	0	0	0	0	0	0	0	0	0	0	0	0	0	0	0	0	0	0	0	0	0	0	0	0	0	0	0	0	0	0	0
2020-01-14	0	0	0	0	0	0	0	0	0	0	0	0	0	0	0	0	0	0	0	0	0	0	0	0	0	0	0	0	0	0	0	0	0	0	0	0	0	0	0	0	0	0	0	0	0	0	0	0	0
2020-01-15	1	0	0	0	0	0	0	0	0	0	0	0	0	0	0	0	0	0	0	0	0	0	0	0	0	0	0	0	0	0	0	0	0	0	0	0	0	0	0	0	0	0	0	0	0	0	0	0	0
2020-01-16	0	0	0	0	0	0	0	0	0	0	0	0	0	0	0	0	0	0	0	0	0	0	0	0	0	0	0	0	0	0	0	0	0	0	0	0	0	0	0	0	0	0	0	0	0	0	0	0	0
2020-01-17	0	0	0	0	0	0	0	0	0	0	0	0	0	0	0	0	0	0	0	0	0	0	0	0	0	0	0	0	0	0	0	0	0	0	0	0	0	0	0	0	0	0	0	0	0	0	0	0	0
2020-01-18	0	0	0	0	0	0	0	0	0	0	0	0	0	0	0	0	0	0	0	0	0	0	0	0	0	0	0	0	0	0	0	0	0	0	0	0	0	0	0	0	0	0	0	0	0	0	0	0	0
2020-01-19	1	0	0	0	0	0	0	0	0	0	0	0	0	0	0	0	0	0	0	0	0	0	0	0	0	0	0	0	0	0	0	0	0	0	0	0	0	0	0	0	0	0	0	0	0	0	0	0	0
2020-01-20	0	0	0	0	0	0	0	0	0	0	0	0	0	0	0	0	0	0	0	0	0	0	0	0	0	0	0	0	0	0	0	0	0	0	0	0	0	0	0	0	0	0	0	0	0	0	0	0	0
2020-01-21	3	0	0	0	0	0	0	0	0	0	0	0	0	0	0	0	0	0	0	0	0	0	0	0	0	0	0	0	0	0	0	0	0	0	0	0	0	0	0	0	0	0	0	0	0	0	0	0	0
2020-01-22	11	0	0	0	0	0	0	0	0	0	0	0	0	0	0	0	0	0	0	0	0	0	0	0	0	0	0	0	0	0	0	0	0	0	0	0	0	0	0	0	0	0	0	0	0	0	0	0	0
2020-01-23	0	0	0	0	0	0	0	0	0	0	0	0	0	0	0	0	0	0	0	0	0	0	0	0	0	0	0	0	0	0	0	0	0	0	0	0	0	0	0	0	0	0	0	0	0	0	0	0	0
2020-01-24	9	0	0	0	0	0	0	0	0	0	0	0	0	0	0	0	0	0	0	0	0	0	0	0	0	0	0	0	0	0	0	0	0	0	0	0	0	0	0	0	0	0	0	0	0	0	0	0	0
2020-01-25	15	0	0	0	0	0	0	0	0	0	0	0	0	0	0	0	0	0	0	0	0	0	0	0	0	0	0	0	0	0	0	0	0	0	0	0	0	0	0	0	0	0	0	0	0	0	0	0	0
2020-01-26	15	0	0	0	0	0	0	0	0	0	0	0	0	0	0	0	0	0	0	0	0	0	0	0	0	0	0	0	0	0	0	0	0	0	0	0	0	0	0	0	0	0	0	0	0	0	0	0	0
2020-01-27	25	0	0	0	0	0	0	0	0	0	0	0	0	0	0	0	0	0	0	0	0	0	0	0	0	0	0	0	0	0	0	0	0	0	0	0	0	0	0	0	0	0	0	0	0	0	0	0	0
2020-01-28	25	0	0	0	0	0	0	0	0	0	0	0	0	0	0	0	0	0	0	0	0	0	0	0	0	0	0	0	0	0	0	0	0	0	0	0	0	0	0	0	0	0	0	0	0	0	0	0	0
2020-01-29	26	0	0	0	0	0	0	0	0	0	0	0	0	0	0	0	0	0	0	0	0	0	0	0	0	0	0	0	0	0	0	0	0	0	0	0	0	0	0	0	0	0	0	0	0	0	0	0	0
2020-01-30	38	0	0	0	0	0	0	0	0	0	0	0	0	0	0	0	0	0	0	0	0	0	0	0	0	0	0	0	0	0	0	0	0	0	0	0	0	0	0	0	0	0	0	0	0	0	0	0	0
2020-01-31	43	0	0	0	0	0	0	0	0	0	0	0	0	0	0	0	0	0	0	0	0	0	0	0	0	0	0	0	0	0	0	0	0	0	0	0	0	0	0	0	0	0	0	0	0	0	0	0	0
2020-02-01	46	0	0	0	0	0	0	0	0	0	0	0	0	0	0	0	0	0	0	0	0	0	0	0	0	0	0	0	0	0	0	0	0	0	0	0	0	0	0	0	0	0	0	0	0	0	0	0	0
2020-02-02	45	0	0	0	0	0	0	1	0	0	0	0	0	0	0	0	0	0	0	0	0	0	0	0	0	0	0	0	0	0	0	0	0	0	0	0	0	0	0	0	0	0	0	0	0	0	0	0	0
2020-02-03	57	0	0	0	0	0	0	0	0	0	0	0	0	0	0	0	0	0	0	0	0	0	0	0	0	0	0	0	0	0	0	0	0	0	0	0	0	0	0	0	0	0	0	0	0	0	0	0	0
2020-02-04	65	0	0	0	0	0	0	0	0	0	0	0	0	0	0	0	0	0	0	0	0	0	0	0	0	0	0	0	0	0	0	0	0	0	0	0	0	0	0	0	0	0	0	0	0	0	0	0	0
2020-02-05	66	0	0	0	0	0	0	0	0	0	0	0	0	0	0	0	0	0	0	0	0	0	0	0	0	0	0	0	0	0	0	0	0	0	0	0	0	0	0	0	0	0	0	0	0	0	0	0	0
2020-02-06	72	0	0	0	0	0	0	0	0	0	0	0	0	0	0	0	0	0	0	0	0	0	0	0	0	0	0	0	0	0	0	0	0	0	0	0	0	0	0	0	0	0	0	0	0	0	0	0	0
2020-02-07	73	0	0	0	0	0	0	0	0	0	0	0	0	0	0	0	0	0	0	0	0	0	0	0	0	0	0	0	0	0	0	0	0	0	0	0	0	0	0	0	0	0	0	0	0	0	0	0	0
2020-02-08	86	0	0	0	0	0	0	0	0	0	0	0	0	0	0	0	0	0	0	0	0	0	0	0	0	0	0	0	0	0	0	0	0	0	0	0	0	0	0	0	0	0	0	0	0	0	0	0	0
2020-02-09	89	0	0	0	0	0	0	0	0	0	0	0	0	0	0	0	0	0	0	0	0	0	0	0	0	0	0	0	0	0	0	0	0	0	0	0	0	0	0	0	0	0	0	0	0	0	0	0	0
2020-02-10	97	0	0	0	0	0	0	0	0	0	0	0	0	0	0	0	0	0	0	0	0	0	0	0	0	0	0	0	0	0	0	0	0	0	0	0	0	0	0	0	0	0	0	0	0	0	0	0	0
2020-02-11	108	0	0	0	0	0	0	0	0	0	0	0	0	0	0	0	0	0	0	0	0	0	0	0	0	0	0	0	0	0	0	0	0	0	0	0	0	0	0	0	0	0	0	0	0	0	0	0	0
2020-02-12	97	0	0	0	0	0	0	0	0	0	0	0	0	0	0	0	0	0	0	0	0	0	0	0	0	0	0	0	0	0	0	0	0	0	0	0	0	0	0	0	0	0	0	0	0	0	0	0	0
2020-02-13	254	0	1	0	0	0	0	0	0	0	0	0	0	0	0	0	0	0	0	0	0	0	0	0	0	0	0	0	0	0	0	0	0	0	0	0	0	0	0	0	0	0	0	0	0	0	0	0	0
2020-02-14	13	0	0	0	0	0	0	0	0	0	0	0	0	0	0	0	0	0	0	0	0	0	0	0	0	0	0	0	0	0	0	0	0	0	0	0	0	0	0	0	0	0	0	0	0	0	0	0	0
2020-02-15	143	0	0	0	0	0	0	0	0	0	0	0	0	0	0	0	0	0	0	1	0	0	0	0	0	0	0	0	0	0	0	0	0	0	0	0	0	0	0	0	0	0	0	0	0	0	0	0	0
2020-02-16	142	0	0	0	0	0	0	0	0	0	0	0	0	0	0	0	0	0	0	0	0	0	0	0	0	0	0	0	0	0	0	0	0	0	0	0	0	0	0	0	0	0	0	0	0	0	0	0	0
2020-02-17	105	0	0	0	0	0	0	0	0	0	0	1	0	0	0	0	0	0	0	0	0	0	0	0	0	0	0	0	0	0	0	0	0	0	0	0	0	0	0	0	0	0	0	0	0	0	0	0	0
2020-02-18	98	0	0	0	0	0	0	0	0	0	0	0	0	0	0	0	0	0	0	0	0	0	0	0	0	0	0	0	0	0	0	0	0	0	0	0	0	0	0	0	0	0	0	0	0	0	0	0	0
2020-02-19	139	0	0	0	0	0	0	0	0	0	0	0	0	0	0	0	0	0	0	0	0	0	0	0	0	0	0	0	0	0	0	0	0	0	0	0	0	0	0	0	0	0	0	0	0	0	0	0	0
2020-02-20	112	0	0	2	0	0	0	0	0	0	0	0	0	0	2	0	0	0	0	0	0	0	0	0	0	0	0	0	0	0	0	0	0	0	0	0	0	0	0	0	0	0	0	0	0	0	0	0	0
2020-02-21	118	1	0	0	0	0	0	0	0	0	0	0	0	0	0	0	0	0	0	0	0	0	0	0	0	0	0	0	0	0	0	0	0	0	0	0	0	0	0	0	0	0	0	0	0	0	0	0	0
2020-02-22	109	1	0	0	0	0	0	0	0	0	0	0	0	0	2	0	0	0	0	0	0	0	0	0	0	0	0	0	0	0	0	0	0	0	0	0	0	0	0	0	0	0	0	0	0	0	0	0	0
2020-02-23	98	3	0	0	0	0	0	0	0	0	0	0	0	0	1	0	0	0	2	0	0	0	0	0	0	0	0	0	0	0	0	0	0	0	0	0	0	0	0	0	0	0	0	0	0	0	0	0	0
2020-02-24	150	2	0	1	0	0	0	0	0	0	0	0	0	0	3	0	0	0	0	0	0	0	0	0	0	0	0	0	0	0	0	0	0	0	0	0	0	0	0	0	0	0	0	0	0	0	0	0	0
2020-02-25	70	1	0	0	0	0	0	0	0	0	0	0	0	0	4	0	0	0	4	0	0	0	0	0	0	0	0	0	0	0	0	0	0	0	0	0	0	0	0	0	0	0	0	0	0	0	0	0	0
2020-02-26	52	3	0	1	0	0	0	0	0	0	0	0	0	0	3	0	0	0	5	0	0	0	0	0	0	0	0	0	0	0	0	0	0	0	0	0	0	0	0	0	0	0	0	0	0	0	0	1	0
2020-02-27	29	1	2	0	0	0	0	0	0	0	0	0	0	0	4	0	0	0	1	1	0	0	0	0	0	0	0	0	0	0	0	0	0	0	0	0	0	0	0	0	0	0	0	0	0	0	0	0	0
2020-02-28	44	1	0	0	0	0	0	0	0	0	0	0	0	0	7	0	0	0	5	0	0	0	0	0	0	0	0	0	0	0	0	0	0	0	0	0	0	0	0	0	0	0	0	0	0	0	0	0	0
2020-02-29	47	3	0	2	0	0	0	0	0	0	0	0	0	0	8	0	0	0	4	0	0	0	0	0	0	0	0	0	0	0	0	0	0	0	0	0	0	0	0	0	0	0	0	0	0	0	0	0	0
2020-03-01	35	1	2	0	0	1	0	0	0	0	0	0	0	0	9	0	0	1	8	0	0	0	0	0	0	0	0	0	0	0	0	0	0	0	0	0	0	0	0	0	1	0	0	0	0	0	0	1	0
2020-03-02	42	5	1	0	0	0	0	0	0	0	0	0	0	0	11	0	0	0	6	0	0	0	0	0	0	0	0	0	0	0	0	0	0	0	0	0	0	0	0	0	1	0	0	0	0	0	0	0	0
2020-03-03	32	6	0	0	0	0	0	0	0	0	0	0	0	0	12	0	0	0	17	1	0	0	0	0	0	0	0	0	0	0	0	0	0	0	0	0	0		0	0	4	0	0	0	0	0	0	0	0
2020-03-04	37	4	0	0	0	0	0	0	0	0	0	0	0	0	11	0	0	0	28	1	0	0		0	0	0	0	0	0	0	0	0	0	0	0	0	0	0	0	0	3	0	0	0	0	0	0	0	0
2020-03-05	31	3	0	0	0	0	0	0	0	0	0	0	0	0	15	0	0	1	27	0	0	0	0	1	0	0	0	0	0	0	0	0	0	0	0	0	0	0	0	0	2	0	0	0	0	0	0	0	0
2020-03-06	30	7	0	0	0	0	0	0	0	0	0	0	0	0	15	0	0	0	41	3	0	0		2	0	0	0	0	0	0	0	0	0	0	1	0	1	0	0	0	1	0	0	0	0	0	0	0	0
2020-03-07	28	2	0	0	0	0	0	0	0	0	0	0	0	0	17	0	0	0	49	2	0	0	0	2	0	1	0	0	0	0	0	0	0	0	0	0	0	0	0	0	2	0	0	0	0	0	0	0	0
2020-03-08	27	6	0	0	0	0	0	0	0	0	0	0	0	0	21	0	0	1	36	1	0	0	0	0	0	0	0	0	0	0	0	0	0	0	0	0	1	0	0	0	3	0	0	0	0	0	0	1	0
2020-03-09	23	1	1	0	0	0	0	0	0	0	0	0	0	0	49	0	0	0	133	9	0	0	0	0	0	2	0	0	0	0	0	0	0	0	1	0	1	0	0	0	4	0	0	0	0	0	0	0	0
2020-03-10	17	3	2	0	0	0	0	0	0	0	0	0	0		43	0	0	0	98	11	2	0	0	23	0	0	0	0	0	0	0	0	0	0	0	0	2		0	0	5	1	0	0	0	0	0	0	0
2020-03-11	22	6	3	0	0	0	0	0	0	0	0	0	0	0	54	0	0	0	167	3	0	0	0	7	0	1	0	0	0	0	0	0	0	0	1	0	1	0	0	0	2	0	0	0	0	1	0	0	0
2020-03-12	11	6	3	0	0	0	0	1	0	1	0	0	0	0	63	0	0	0	196	15	1	0	0	12	0	1	0	0	3	0	1	0	0	0	1	1	0	1	0	0	2	0	0	0	0	0	0	0	0
2020-03-13	7	1	4	0	0	0	0	0	0	0	0	0	1	0	75	0	0	0	189	13	2	0	0	37	0	0	1	1	0	0	0	1	0	0	0	0	4	0	0	0	10	0	0	0	0	0	0	0	0
2020-03-14	15	5	2	0	0	0	0	4	0	3	0	0	1	0	85	0	0	0	252	18	0	0	0	37	0	0	0	1	0	1	0	0	0	0	3	0	0	0	0	0	7	0	0	1	0	0	0	1	0
2020-03-15	9	3	1	0	0	0	0	0	0	0	0	0	0	0	97	0	0	0	173	12	3	0	0	15	0	7	0	1	1	0	0	0	0	0	4	2	11	1	0	0	10	0	0	1	0	0	0	0	0
2020-03-16	14	0	2	0	0	0	0	6	0	1	0	0	0	0	113	0	0	2	370	36	4	0	0	152	0	8	0	0	0	0	2	0	0	1	2	1	14	0	0	0	12	0	0	0	0	0	0	0	0
2020-03-17	9	6	4	0	0	0	0	0	0	0	0	0	1	0	129	0	0	0	347	21	1	0	0	21	0	4	2	1	1	0	4	2	0	0	1	0	20	0	0	0	16	3	0	0	0	0	0	0	0
2020-03-18	16	5	0	0	0	0	0	2	2	0	0	0	0	0	135	0	0	0	347	27	0	0	0	182	1	19	0	1	0	0	1	0	0	3	5	1	5	0	0	0	23	4	0	0	0	0	1	0	0
2020-03-19	8	5	1	0	0	0	0	3	0	0	0	0	0	0	147	0	1	1	473	69	0	0	0	107	1	15	1	0	9	1	2	0	0	0	2	0	43	0	0	0	42	1	0	1	0	0	3	0	0
2020-03-20	4	9	4	0	0	0	0	1	0	14	2	0	1	0	149	0	3	0	429	128	30	0	0	169	1	18	2	0	7	2	0	3	0	2	12	0	41	1	1	0	0	1	0	0	0	0	2	1	2
2020-03-21	6	3	2	0	0	0	0	0	0	6	1	1	0	1	149	0	5	1	625	78	2	0	0	235	3	30	0	0	16	1	6	1	0	3	10	3	33	0	0	0	110	2	2	4	0	0	5	0	1
2020-03-22	6	1	1	0	2	0	0	7	2	13	0	0	0	0	123	0	12	0	795	112	22	0	0	324	6	30	2	0	30	3	4	0	1	4	13	5	56	0	0	0	80	1	0	0	0	2	7	1	2
2020-03-23	9	9	5	0	0	0	0	0	6	10	2	0	3	0	129	0	9	0	649	112	27	1	2	394	2	43	8	2	8	0	1	0	0	0	4	2	48	1	0	0	131	5	0	7	1	0	7	0	0
2020-03-24	7	7	1	0	0	3	0	8	4	1	1	0	2	0	127	0	7	0	601	186	32	0	5	462	9	34	9	1	13	0	4	1	0	11	6	2	54	2	1	0	119	6	2	4	1	3	9	0	0
2020-03-25	4	6	1	0	0	0	0	2	1	6	1	0	0	2	122	1	7	1	743	240	23	2	4	514	10	63	5	2	34	0	11	2	0	8	20	3	87	1	0	0	211	3	1	9	0	0	12	2	2
2020-03-26	6	5	2	0	0	0	0	3	4	3	1	0	4	2	143	1	15	0	685	231	49	3	2	738	10	80	4	4	56	0	6	2	2	2	17	2	41	2	0	0	249	8	0	2	1	0	11	2	1
2020-03-27	5	8	1	0	0	1	0	7	4	20	1	0	4	3	157	1	16	5	660	365	55	3	4	655	17	78	18	2	42	1	24	2	1	7	58	4	115	10	0	2	246	4	3	5	1	3	20	4	1
2020-03-28	3	5	3	0	3	0	0	9	3	9	0	0	2	2	144	0	17	0	971	299	72	0	7	769	16	112	16	0	69	6	26	2	3	11	36	2	181	3	0	2	411	14	4	7	1	5	15	5	2
2020-03-29	5	8	3	0	3	1	0	14	1	15	2	0	6	2	139	1	16	1	887	319	64	2	5	832	24	93	0	2	64	3	10	4	2	13	38	4	260	14	0	1	484	7	4	7	1	3	22	2	5
2020-03-30	2	6	2	0	2	1	0	3	7	12	2	3	4	3	123	4	23	2	758	292	66	5	11	838	19	132	18	4	78	3	8	2	2	7	22	6	209	10	0	3	318	1	4	10	1	7	22	1	2
2020-03-31	3	5	2	0	0	3	0	17	3	8	5	0	3	2	117	0	37	3	810	418	128	8	4	812	21	93	22	9	82	1	36	4	2	5	38	5	180	8	0	2	661	28	8	4	1	2	23	4	6
2020-04-01	1	0	0	0	0	0	0	0	0	14	8	0	3	3	141	2	46	1	839	499	149	7	25	849	20	175	20	2	192	1	34	2	4	13	78	6	381	17	0	7	909	7	1	17	4	4	42	0	6
2020-04-02	6	6	1	0	1	2	0	8	8	21	5	0	15	1	138	6	63	1	727	509	140	8	16	864	27	134	18	10	123	6	59	4	0	14	5	1	743	14	0	7	1059	13	8	67	4	2	40	7	17
2020-04-03	10	5	6	0	1	3	0	11	5	13	0	0	6	13	124	5	79	2	760	471	0	5	9	950	22	166	12	14	183	1	43	10	2	19	158	3	389	13	2	6	915	29	0	0	2	5	58	3	8
2020-04-04	4	3	6	0	0	4	0	29	3	11	0	0	12	5	0	0	69	7	764	2004	145	9	39	932	37	148	10	14	132	1	51	2	1	16	71	6	684	22	0	4	1104	49	23	25	4	4	60	3	6
2020-04-05	3	6	1	0	1	4	0	8	4	10	4	0	9	7	292	8	76	4	681	1053	325	6	8	809	20	164	18	8	140	0	40	6	5	22	59	9	708	17	0	9	1344	44	19	27	5	5	73	6	12
2020-04-06	2	3	3	0	0	3	0	8	4	7	15	0	32	3	151	5	73	2	527	518	92	8	7	674	29	115	18	15	164	5	28	8	2	18	19	5	621	21	0	2	1146	49	15	8	7	8	54	3	10
2020-04-07	0	6	7	0	0	0	0	11	1	11	4	0	5	8	136	4	75	6	636	833	173	11	9	637	16	101	16	13	185	5	76	1	0	8	25	6	439	16	2	2	1342	43	31	11	3	1	67	7	9
2020-04-08	2	8	0	0	0	4	0	14	1	12	4	0	35	8	133	3	76	3	604	1417	254	10	25	743	34	234	23	22	403	3	114	10	7	16	57	2	786	36	0	11	1906	57	16	29	6	4	114	7	15
[truncated: 251 more columns]

## Sheet: lag
id	Nation	BPI	BDI	LAG	ASIA
1	China(main)	27	30	3	1
2	Korea	53	56	3	1
3	Japan	67	74	7	1
4	Singapore	28	84	56	1
5	Thailand	78	89	11	1
6	Vietnam	87			1
7	Philippine	77	78	1	1
8	Malaysia	67	81	14	1
9	Indonesia	83	84	1	1
10	Pakistan	80	94	14	1
11	Taiwan	79	92	13	1
12	Israel	63	88	25	0
13	Iran	58	62	4	0
14	Saudi_Arabia	74	94	20	0
15	Turkey	80	85	5	0
16	Austraria	66	90	24	0
17	Italy	56	62	6	0
18	France	62	72	10	0
19	Germany	63	82	19	0
20	Czech_Republic	67	88	21	0
21	Romania	71	87	16	0
22	Spain	68	72	4	0
23	Portugal	68	83	15	0
24	Netherlands	64	77	13	0
25	Austria	62	79	17	0
26	Poland	74	89	15	0
27	Belgium	66	81	15	0
28	Luxembourg	63	76	13	0
29	Sweden	62	79	17	0
30	Norway	62	79	17	0
31	Finland	64	88	24	0
32	Denmark	64	80	16	0
33	Switzerland	61	74	13	0
34	Greece	68	83	15	0
35	United Kingdom	67	78	11	0
36	Ireland	67	85	18	0
37	Iceland	62	82	20	0
38	Russia	80			0
39	USA	69	81	12	0
40	Canada	68	83	15	0
41	Mexico	80	98	18	0
42	Ecuador	77	84	7	0
43	Chile	72	93	21	0
44	Panama	73	86	13	0
45	Brazil	78	89	11	0
46	Argentina	77	91	14	0
47	Peru	75	91	16	0
48	South_Africa	78			0
	Cruse ship				1
	India	95	101	6	1

## Sheet: Continentals
	Infected		Population	Infectd/population	ratio	Wiki 2016
Asia	267863	0.165351	4623	57.9414	1	4438
Europe	790352	0.487882	743	1063.73	18.3587	738
North America	500819	0.309154	598	837.49	14.4541	579
South America	39662	0.0244833	436	90.9679	1.57	422
Oceania	7573	0.0046748	42	180.31	3.11193	39.9
Africa	12983	0.00801438	1353	9.59571	0.165611	1216
	712	0.000439516
Sum	1619964		7795
as of 19:31, April 10, 2020
