# Supplementary material for: Global Comparison of Changes in the Number of Test-Positive Cases and Deaths by Coronavirus Infection (COVID-19) in the World
Source: Preprints.org preprint supplement (doi:10.20944/preprints202004.0374.v2), 2020-06-03
Supplement: Supplementary file 3 [file PCRtest.xlsx]

## Sheet: PCR by Wiki
Country or region	Tests	Positive	As of	Tests /	Positive /	Positive	Ref.	lag	region	asia	1	Latin	4
				million						middle east	2
				people						Western	3
Ecuador	13039	3747	2020-04-06	763	219	28.7	[128]	7	4
Panama	7333	1317	2020-04-01	1756	315	18	[167]	13	4
Brazil	54824	7910	2020-04-02	261	38	14.4	[103]	11	4
Argentina	14850	1795	2020-04-09	329	40	12.1	[88]	14	4
Mexico	17184	1890	2020-04-04	136	15	11	[155]	18	4
Chile	54864	4815	2020-04-06	2877	252	8.8	[120]	21	4						Western coutries
Peru	12669	852	2020-03-27	386	26	6.7	[168]	16	4				14.2429		Positive ratio	Lag time
Belgium	84248	23403	2020-04-07	7316	2032	27.8	[98][99]	15	3		12.2	1.92354			27.8	15
United Kingdom	243421	65077	2020-04-09	3604	963	26.7	[191]	11	3						26.7	11
France	224254	54627	2020-04-02	3346	815	24.4	[133]	10	3						24.4	10
Netherlands	101534	21699	2020-04-08	5827	1245	21.4	[158]	13	3						21.4	13
United States	2378143	457963	2020-04-09	7245	1395	19.3	[193]	12	3						19.3	12
Italy	853369	143626	2020-04-09	14148	2381	16.8	[143]	6	3		14.6667	4.24264			16.8	6
Switzerland	167429	22242	2020-04-07	19536	2595	13.3	[184]	13	3						13.3	13
Ireland	42484	5593	2020-04-06	8922	1175	13.2	[141]	18	3						13.2	18
Sweden	54700	7206	2020-04-07	6383	841	13.2	[183]	17	3						13.2	17
Austria	134743	13337	2020-04-10	15135	1498	9.9	[92]	17	3						9.9	17
Romania	55430	5467	2020-04-10	2857	282	9.9	[172]	16	3						9.9	16
Denmark	70983	6014	2020-04-10	11972	1014	8.5	[127]	16	3						8.5	16
Germany	1317887	100901	2020-04-05	15850	1213	7.7	[47]	19	3						7.7	19
Spain	355000	24926	2020-03-21	7596	533	7	[181][182]	10	3						7	10
Finland	36500	2487	2020-04-08	6598	450	6.8	[131][132]	24	3		18.875	3.90741			6.8	24
Greece	28584	1832	2020-04-07	2654	170	6.4	[134]	15	3						6.4	15
Canada	384185	20765	2020-04-09	10138	548	5.4	[106]	15	3						5.4	15
Norway	121034	6160	2020-04-09	22549	1148	5.1	[162]	17	3						5.1	17
Iceland	34125	1675	2020-04-10	93683	4598	4.9	[137]	20	3						4.9	20
Poland	118295	5742	2020-04-10	3082	150	4.9	[170]	15	3						4.9	15
Czechia	114854	5569	2020-04-09	10785	523	4.8	[126]	21	3						4.8	21
Australia	338449	6215	2020-04-10	13325	245	1.8	[90]	24	3				11.7818		1.8	24
Iran	211136	62589	2020-04-07	2538	752	29.6	[140]	4	2
Turkey	276338	42282	2020-04-09	3323	508	15.3	[188]	5	2
Israel	138597	10067	2020-04-09	15106	1097	7.3	[142]	25	2				17.4
Indonesia	16848	3293	2020-04-09	63	12	19.5	[139]	1	1
Philippines	24500	3660	2020-04-07	243	36	14.9	[169]	1	1
Pakistan	54706	4601	2020-04-09	258	22	8.4	[163]	14	1
Thailand	23669	1978	2020-04-03	341	28	8.4	[186]	11	1
Japan	68771	5347	2020-04-10	545	42	7.8	[145]	7	1
Malaysia	63367	4228	2020-04-09	1934	129	6.7	[153]	14	1
India	144910	5705	2020-04-08	107	4.2	3.9	[138]	6	1
South Korea	477304	10331	2020-04-07	9231	200	2.2	[180]	3	1
Singapore	65000	1309	2020-04-06	11396	230	2	[176]	56	1
Taiwan	43886	382	2020-04-10	1845	16	0.87	[185]	13	1
China								3	1				6.82636
New Jersey	107192	51027	2020-04-09	12068	5745	47.6	[199]
New York	391549	159937	2020-04-09	20127	8221	40.8	[200]
Lombardy	176953	54802	2020-04-09	17589	5447	31	[143]
Michigan	69425	21504	2020-04-09	6928	2146	31	[198]
Piedmont	52807	14522	2020-04-09	12122	3333	27.5	[143]
Liguria	18446	5020	2020-04-09	11896	3237	27.2	[143]
Marche	18194	4955	2020-04-09	11928	3249	27.2	[143]
Grenada	37	10	2020-04-01	332	90	27	[135]
Tokyo	5821	1519	2020-04-09	418	109	26.1	[146]
Serbia	9626	2447	2020-04-07	1382	351	25.4	[175]
Ukraine	8763	2203	2020-04-10	208	52	25.1	[189]
Emilia-Romagna	81715	18677	2020-04-09	18324	4188	22.9	[143]
Louisiana	86919	18283	2020-04-09	18697	3933	21	[197]
Illinois	80857	16422	2020-04-09	6381	1296	20.3	[196]
Scotland	27518	4957	2020-04-09	5060	912	18	[192]
Bolivia	591	97	2020-03-19	52	8.5	16.4	[100]
Armenia	5823	921	2020-04-09	1973	312	15.8	[89]
Trinidad and Tobago	595	90	2020-04-01	436	66	15.1	[187]
Albania	3385	416	2020-04-10	1182	145	12.3	[87]
Uruguay	1538	189	2020-03-24	443	54	12.3	[203]
Barbados	382	45	2020-04-01	1331	157	11.8	[96]
Bosnia and Herzegovina	9189	998	2020-04-10	2753	299	10.9	[101][102]
Florida	156852	16826	2020-04-10	7303	783	10.7	[195]
Croatia	12322	1282	2020-04-07	3023	315	10.4	[125]
California	177600	18309	2020-04-09	4495	463	10.3	[194]
Tuscany	65461	6552	2020-04-09	17552	1757	10	[143]
Jamaica	442	44	2020-04-01	162	16	10	[144]
Montenegro	2545	255	2020-04-10	4032	404	10	[156]
Portugal	131127	13141	2020-04-08	12760	1279	10	[171]
North Macedonia	6230	617	2020-04-07	2999	297	9.9	[161]
Texas	106134	10230	2020-04-09	3660	353	9.6	[201]
Quebec	109270	10031	2020-04-08	12799	1175	9.2	[116][117]
Costa Rica	3845	347	2020-03-31	769	69	9	[124]
Washington	87918	7591	2020-04-04	11546	997	8.6	[202]
Kosovo	2687	227	2020-04-09	1484	125	8.4	[148]
Venezuela	1779	143	2020-03-31	62	5	8	[204][205]
Veneto	171456	12933	2020-04-09	34949	2636	7.5	[143]
Ontario	88698	5759	2020-04-08	6029	391	6.5	[114]
Colombia	34910	2223	2020-04-09	723	46	6.4	[123]
Bangladesh	7359	424	2020-04-10	45	2.6	5.8	[95]
Newfoundland and Labrador	4149	232	2020-04-08	7958	445	5.6	[111]
Estonia	27883	1258	2020-04-10	20991	947	4.5	[130]
Belarus	49000	1981	2020-04-10	5162	209	4	[97]
Hungary	29948	1190	2020-04-10	3064	122	4	[136]
Slovenia	30669	1103	2020-04-07	14646	527	3.6	[178]
Egypt	25000	865	2020-03-25	250	8.6	3.5	[129]
Tasmania	3591	122	2020-04-10	6721	228	3.4	[91]
Bulgaria	15899	522	2020-04-05	2288	75	3.3	[104][105]
Slovakia	16191	534	2020-04-05	2971	98	3.3	[177]
Malta	4462	139	2020-03-27	9040	282	3.1	[154]
Nova Scotia	11688	342	2020-04-08	11958	350	2.9	[113]
South Africa	53937	1585	2020-04-04	918	27	2.9	[179]
Lithuania	36051	999	2020-04-10	12901	358	2.8	[152]
British Columbia	53505	1370	2020-04-09	10469	268	2.6	[108]
Kazakhstan	30358	802	2020-04-10	1646	43	2.6	[147]
Western Australia	21114	506	2020-04-10	8054	193	2.4	[90]
Latvia	25458	589	2020-04-09	13260	307	2.3	[151]
New South Wales	137441	2822	2020-04-10	16990	349	2.1	[90]
Alberta	70247	1451	2020-04-09	15918	329	2.1	[107]
Victoria	62000	1241	2020-04-10	9401	188	2	[90]
New Zealand	55685	1015	2020-04-10	11199	204	1.8	[159]
Australian Capital Territory	6120	103	2020-04-10	14342	241	1.7	[90]
Prince Edward Island	1470	25	2020-04-08	9295	158	1.7	[115]
Saskatchewan	15621	271	2020-04-08	13219	229	1.7	[118]
Azerbaijan	57371	926	2020-04-01	5796	94	1.6	[93]
Bahrain	55096	887	2020-04-09	35105	565	1.6	[94]
New Brunswick	6549	103	2020-04-08	8396	138	1.6	[110]
Palestine	5562	91	2020-03-27	1101	18	1.6	[164][165][166]
Manitoba	15259	224	2020-04-09	11077	163	1.5	[109]
Queensland	69194	965	2020-04-10	13580	189	1.4	[90]
Moscow Oblast	55203	748	2020-04-09	7357	100	1.4	[174]
Kyrgyzstan	8186	107	2020-03-31	1281	17	1.3	[149][150]
South Australia	35716	428	2020-04-10	20389	244	1.2	[90]
Russia	1092811	11917	2020-04-09	7447	81	1.1	[173]
Yukon	794	8	2020-04-08	19329	195	1	[119]
Northern Territory	3243	28	2020-04-10	13190	114	0.85	[90]
Hong Kong	96709	714	2020-03-31	12925	95	0.74	[122]
United Arab Emirates	593095	2659	2020-04-08	61785	277	0.45	[190]
Guangdong	320000	1332	2020-02-20	3068	13	0.42	[121]
Northwest Territories	1299	5	2020-04-08	28928	111	0.38	[112]
Nepal	2366	9	2020-04-08	84	0.3	0.38	[157]
Vietnam	114241	255	2020-04-09	1187	2.7	0.22	[206]
North Korea	709	0	2020-04-02	28	0	0	[160]

## Sheet: Popuation by Wiki
Rank	Country (or dependent territory)	Population	% of world	Date	Source
			population
1	China[b]	1402146320	0.18	2020-04-10	National population clock[3]
2	India[c]	1360859080	0.175	2020-04-10	National population clock[4]
3	United States[d]	329601928	0.0424	2020-04-10	National population clock[5]
4	Indonesia	266911900	0.0343	2019-07-01	National annual projection[6]
5	Pakistan[e]	219236520	0.0282	2020-04-10	2017 census[7]
6	Brazil	211372017	0.0272	2020-04-10	National population clock[8]
7	Nigeria	206139587	0.0265	2020-07-01	UN projection[2]
8	Bangladesh	168416928	0.0217	2020-04-10	National population clock[9]
9	Russia[f]	146745098	0.0189	2020-01-01	National estimate[10]
10	Mexico	126577691	0.0163	2019-07-01	National annual projection[11]
11	Japan	125950000	0.0162	2020-03-01	Monthly provisional estimate[12]
12	Philippines	108521666	0.014	2020-04-10	National population clock[13]
13	Egypt	100231529	0.0129	2020-04-10	National population clock[14]
14	Ethiopia	98665000	0.0127	2019-07-01	National annual projection[15]
15	Vietnam	96208984	0.0124	2019-04-01	Preliminary 2019 census result[16]
16	DR Congo	89561404	0.0115	2020-07-01	UN projection[2]
17	Iran	83352889	0.0107	2020-04-10	National population clock[17]
18	Turkey	83154997	0.0107	2019-12-31	National annual estimate[18]
19	Germany	83149300	0.0107	2019-09-30	National estimate[19]
20	France[g]	67076000	0.00862	2020-03-01	Monthly national estimate[20]
21	Thailand	66491705	0.00855	2020-04-10	National population clock[21]
22	United Kingdom[h]	66435550	0.00854	2018-06-30	National annual estimate[22]
23	Italy	60238522	0.00775	2019-11-30	Monthly national estimate[23]
24	South Africa	58775022	0.00756	2019-07-01	National annual estimate[24]
25	Tanzania[i]	55890747	0.00719	2019-07-01	National annual projection[25]
26	Myanmar	54339766	0.00699	2019-07-01	National annual projection[26]
27	South Korea	51780579	0.00666	2020-07-01	National annual projection[27]
28	Colombia	49395678	0.00635	2019-06-30	National annual projection[28]
29	Kenya	47564296	0.00612	2019-08-31	2019 census result[29]
30	Spain	47100396	0.00606	2019-07-01	National estimate[30]
31	Argentina	44938712	0.00578	2019-07-01	National annual projection[31]
32	Algeria	43000000	0.00553	2019-01-01	National annual projection[32]
33	Sudan	42414220	0.00545	2020-04-10	National population clock[33]
34	Ukraine[j]	41879904	0.00538	2020-02-01	Monthly national estimate[34]
35	Uganda	40299300	0.00518	2019-07-01	National annual projection[35]
36	Iraq	39127900	0.00503	2019-07-01	National annual projection[36]
37	Poland	38379000	0.00493	2020-01-31	National estimate[37]
38	Canada	37988451	0.00488	2020-04-10	National population clock[38]
39	Morocco[k]	35864417	0.00461	2020-04-10	National population clock[39]
40	Saudi Arabia	34218169	0.0044	2019-07-01	National estimate
41	Uzbekistan	34118612	0.00439	2020-04-10	National population clock[40]
42	Malaysia	32745760	0.00421	2020-04-10	National population clock[41]
43	Afghanistan	32225560	0.00414	2019-07-01	National annual estimate[42]
44	Venezuela	32219521	0.00414	2019-06-30	National annual projection
45	Peru	32131400	0.00413	2019-06-30	National annual projection[43]
46	Angola	31127674	0.004	2020	National projection[44]
47	Ghana	30280811	0.00389	2019-07-01	National projection[45]
48	Mozambique	30066648	0.00387	2020	National projection[46]
49	Nepal	29996478	0.00386	2020-07-01	National annual projection[47]
50	Yemen	29825968	0.00383	2020-07-01	UN projection[2]
51	Cameroon	26545864	0.00341	2020-07-01	UN projection[2]
52	Madagascar	26251309	0.00338	2020	Official Projection[48]
53	Ivory Coast	25823071	0.00332	2019-07-01	National projection[49]
54	Australia	25673566	0.0033	2020-04-10	National population clock[50]
55	North Korea	25450000	0.00327	2019-07-01	National annual projection[51]
–	Taiwan[l]	23604265	0.00303	2020-01-31	Monthly national estimate[52]
56	Niger	22314743	0.00287	2019-07-01	National annual projection[53]
57	Sri Lanka	21803000	0.0028	2019-07-01	National estimate[54]
58	Burkina Faso	20870060	0.00268	2019-07-01	National annual projection[55]
59	Mali	19973000	0.00257	2019-07-01	National annual projection[56]
60	Romania	19405156	0.00249	2019-01-01	National annual estimate[57]
61	Malawi	19129952	0.00246	2020-07-01	UN projection[58]
62	Chile	19107216	0.00246	2019-07-01	National annual projection[59]
63	Kazakhstan	18679400	0.0024	2020-04-10	National population clock[60]
64	Zambia	17885422	0.0023	2020-07-01	National annual projection[61]
65	Syria	17500657	0.00225	2020-07-01	UN projection[2]
66	Ecuador	17462132	0.00225	2020-04-10	National population clock[62]
67	Netherlands[m]	17453831	0.00224	2020-04-10	National population clock[63]
68	Guatemala	16604026	0.00213	2019-07-01	National annual projection[64]
69	Chad	16244513	0.00209	2020	National annual projection[65]
70	Senegal	16209125	0.00208	2019-07-01	National annual projection[66]
71	Somalia[n]	15893219	0.00204	2020-07-01	UN projection[2]
72	Cambodia	15288489	0.00197	2019-03-03	Provisional 2019 census result[67]
73	Zimbabwe	15159624	0.00195	2019-07-01	National annual projection[68]
74	South Sudan	12778250	0.00164	2019-07-01	National annual projection[69]
75	Rwanda	12374397	0.00159	2019-07-01	National projection annual[70]
76	Guinea	12218357	0.00157	2019-07-01	National projection[71]
77	Benin	11733059	0.00151	2019-07-01	National projection annual[72]
78	Tunisia	11722038	0.00151	2019-07-01	National estimate[73]
79	Haiti	11577779	0.00149	2019-07-01	National annual projection[74]
80	Belgium	11524454	0.00148	2020-01-01	Monthly national estimate[75]
81	Bolivia	11469896	0.00147	2019-07-01	National projection annual[76]
82	Cuba	11209628	0.00144	2018-12-31	National annual estimate[77]
83	Burundi	10953317	0.00141	2019-07-01	National annual projection[78]
84	Greece	10724599	0.00138	2019-01-01	National estimate[79]
85	Czech Republic	10693939	0.00137	2019-12-31	National quarterly estimate[80]
86	Jordan	10655188	0.00137	2020-04-10	National population clock[81]
87	Dominican Republic	10358320	0.00133	2019-07-01	National projection[82]
88	Sweden	10338368	0.00133	2020-02-29	National monthly estimate[83]
89	Portugal	10276617	0.00132	2018-12-31	National annual estimate[84]
90	Azerbaijan	10067108	0.00129	2020-01-01	National estimate[85]
91	United Arab Emirates	9890400	0.00127	2020-07-01	UN projection[2]
92	Hungary	9772756	0.00126	2019-01-01	National estimate[86]
93	Belarus	9408400	0.00121	2020-01-01	National annual estimate[87]
94	Israel	9183600	0.00118	2020-04-10	National population clock[88]
95	Honduras	9158345	0.00118	2019-07-01	National annual projection[89]
96	Tajikistan	9127000	0.00117	2019-01-01	National estimate[90]
97	Papua New Guinea	8935000	0.00115	2020	National annual projection[91]
98	Austria	8902600	0.00114	2020-01-01	Quarterly provisional figure[92]
99	Switzerland	8603900	0.00111	2019-12-31	National provisional figure[93]
100	Sierra Leone	7901454	0.00102	2019-07-01	National annual projection[94]
101	Togo	7538000	0.000969	2019-07-01	National annual projection[95]
–	Hong Kong (China)	7500700	0.000964	2019-12-31	National estimate[96]
102	Paraguay	7152703	0.00092	2019-07-01	National annual projection[97]
103	Laos	7123205	0.000916	2019-07-01	National annual projection[98]
104	Bulgaria	7000039	0.0009	2018-12-31	National estimate[99]
105	Serbia[o]	6963764	0.000895	2019-01-01	National annual estimate[100]
106	Libya	6871287	0.000883	2020-07-01	UN projection[2]
107	Lebanon	6825442	0.000878	2020-07-01	UN projection[2]
108	Kyrgyzstan	6533500	0.00084	2020-02-01	National estimate[101]
109	El Salvador	6486201	0.000834	2020-07-01	UN projection[2]
110	Nicaragua	6460411	0.000831	2018-06-30	National estimate[102]
111	Turkmenistan	6031187	0.000775	2020-07-01	UN projection[2]
112	Denmark	5822763	0.000749	2020-01-01	National quarterly estimate[103]
113	Singapore	5703600	0.000733	2019-06-30	National estimate[104]
114	Finland	5527573	0.000711	2019-12-31	National monthly estimate[105]
115	Congo	5518092	0.000709	2020-07-01	UN projection[2]
116	Central African Republic	5496011	0.000707	2019-07-01	National annual projection[106]
117	Slovakia	5456362	0.000702	2019-09-30	National estimate[107]
118	Norway	5367580	0.00069	2020-01-01	National quarterly estimate[108]
119	Costa Rica	5058007	0.00065	2019-06-30	National annual projection[109]
120	Palestine	4976684	0.00064	2019-07-01	National annual projection[110]
121	New Zealand	4977016	0.00064	2020-04-10	National population clock[111]
122	Ireland	4921500	0.000633	2019-04-01	National estimate[112]
123	Oman	4664790	0.0006	2020-01-01	National estimate[113]
124	Liberia	4475353	0.000575	2019-07-01	National projection[114]
125	Kuwait	4420110	0.000568	2019-01-01	National annual estimate[115]
126	Panama	4218808	0.000542	2019-07-01	National annual projection[116]
127	Mauritania	4077347	0.000524	2019-07-01	National annual projection[117]
128	Croatia	4076246	0.000524	2018-12-31	National annual estimate[118]
129	Georgia[p]	3723464	0.000479	2019-01-01	National annual estimate[119]
130	Uruguay	3518552	0.000452	2019-06-30	National annual projection[120]
131	Eritrea	3497117	0.00045	2019-07-01	UN projection[2]
132	Mongolia	3311902	0.000426	2020-04-10	National population clock[121]
133	Bosnia and Herzegovina	3301000	0.000424	2019-07-01	UN projection[2]
–	Puerto Rico (US)	3193694	0.000411	2019-07-01	National estimate[122]
134	Armenia	2957500	0.00038	2019-09-30	National quarterly estimate[123]
135	Albania	2845955	0.000366	2020-01-01	National annual estimate[124]
136	Lithuania	2793471	0.000359	2020-03-01	Monthly national estimate[125]
137	Qatar	2747282	0.000353	2019-09-30	Monthly national estimate[126]
138	Jamaica	2726667	0.000351	2018-12-31	National estimate[127]
139	Moldova[q]	2681735	0.000345	2019-01-01	National estimate[128]
140	Namibia	2458936	0.000316	2019-07-01	National projection[129]
141	Gambia	2347706	0.000302	2019-07-01	UN projection[2]
142	Botswana	2338851	0.000301	2019-07-01	National annual projection[130]
143	Gabon	2172579	0.000279	2019-07-01	UN projection[2]
144	Slovenia	2094060	0.000269	2019-10-01	National estimate[131]
145	North Macedonia	2077132	0.000267	2018-12-31	National estimate[132]
146	Lesotho	2007201	0.000258	2016-04-10	2016 census result[133]
147	Latvia	1906800	0.000245	2020-02-01	Monthly national estimate[134]
–	Kosovo[r]	1795666	0.000231	2018-12-31	National annual estimate[135]
148	Guinea-Bissau	1604528	0.000206	2019-07-01	National annual projection[136]
149	Bahrain	1543300	0.000198	2019-07-01	National annual projection[137]
150	East Timor	1387149	0.000178	2019-07-01	National annual projection[138]
151	Trinidad and Tobago	1363985	0.000175	2019-06-30	National estimate[139]
152	Equatorial Guinea	1358276	0.000175	2018-07-01	National estimate[140]
153	Estonia	1328360	0.000171	2020-01-01	National estimate[141]
154	Mauritius	1265985	0.000163	2019-07-01	National estimate[142]
155	Eswatini	1093238	0.000141	2017-05-11	National census result[143]
156	Djibouti	1078373	0.000139	2019-07-01	National annual projection[144]
157	Fiji	884887	0.000114	2017-09-17	National census result[145]
158	Cyprus[s]	875900	0.000113	2018-12-31	National annual estimate[146]
159	Comoros	873724	0.000112	2019-07-01	National estimate[147]
160	Guyana	782766	0.000101	2019-07-01	UN projection[2]
161	Bhutan	741672	9.54e-05	2019-07-01	National annual projection[148]
162	Solomon Islands	680806	8.75e-05	2019-07-01	National annual projection[149]
–	Macau (China)	679600	8.74e-05	2019-12-31	National quarterly estimate[150]
163	Montenegro	622359	8e-05	2018-01-01	National estimate[151]
164	Luxembourg	626108	8.05e-05	2020-01-01	National estimate[152]
–	Western Sahara[t]	582463	7.49e-05	2019-07-01	UN projection[2]
165	Suriname	581372	7.47e-05	2019-07-01	UN projection[2]
166	Cape Verde	550483	7.08e-05	2019-07-01	National annual projection[153]
167	Malta	493559	6.35e-05	2018-12-31	National estimate[154]
–	Transnistria[u]	469000	6.03e-05	2018-01-01	National estimate[155]
168	Brunei	442400	5.69e-05	2018-07-01	National estimate[156]
169	Belize	408487	5.25e-05	2019-07-01	National estimate[157]
170	Bahamas	385340	4.95e-05	2019-07-01	National annual projection[158]
171	Maldives	374775	4.82e-05	2018-12-31	National annual estimate[159]
172	Iceland	364260	4.68e-05	2019-12-31	National quarterly estimate[160]
—	Northern Cyprus[v]	351965	4.53e-05	2017-12-31	National estimate[161]
173	Vanuatu	304500	3.92e-05	2018-07-01	National annual estimate[91]
174	Barbados	287025	3.69e-05	2019-07-01	UN projection[2]
–	New Caledonia (France)	282200	3.63e-05	2018-01-01	National annual estimate[162]
–	French Polynesia (France)	275918	3.55e-05	2017-08-17	2017 census results[163]
–	Abkhazia[w]	244832	3.15e-05	2018-01-01	National estimate[164]
175	São Tomé and Príncipe	201784	2.59e-05	2018-07-01	National estimate[165]
176	Samoa	200874	2.58e-05	2019-07-01	National projection[166]
177	Saint Lucia	178696	2.3e-05	2018-07-01	National annual estimate[167]
–	Guam (US)	172400	2.22e-05	2018-07-01	National annual estimate[91]
–	Curaçao (Netherlands)	158665	2.04e-05	2019-01-01	National annual estimate[168]
–	Artsakh[x]	148000	1.9e-05	2019-01-01	National annual estimate[169]
178	Kiribati	120100	1.54e-05	2018-07-01	National annual estimate[91]
–	Aruba (Netherlands)	112309	1.44e-05	2019-03-31	National quarterly estimate[170]
179	Grenada	112003	1.44e-05	2019-07-01	UN projection[2]
180	Saint Vincent and the Grenadines	110608	1.42e-05	2019-07-01	National estimate[171]
–	Jersey (UK)	106800	1.37e-05	2018-12-31	National estimate[172]
–	U.S. Virgin Islands (US)	104578	1.34e-05	2019-07-01	UN projection[2]
181	F.S. Micronesia	104468	1.34e-05	2019-07-01	National annual projection[173]
182	Tonga	100651	1.29e-05	2016-11-30	2016 census result[174]
183	Seychelles	97625	1.26e-05	2019-06-30	National estimate[175]
184	Antigua and Barbuda	96453	1.24e-05	2019-07-01	National annual projection[176]
–	Isle of Man (UK)	83314	1.07e-05	2016-04-24	2016 census result[177]
185	Andorra	77543	9.97e-06	2019-12-31	National estimate[178]
186	Dominica	71808	9.23e-06	2019-07-01	UN projection[2]
–	Cayman Islands (UK)	65813	8.46e-06	2018-12-31	National estimate[179]
–	Bermuda (UK)	64027	8.23e-06	2019-07-01	National annual projection[180]
–	Guernsey (UK)	62792	8.07e-06	2019-03-31	National estimate[181]
–	American Samoa (US)	56700	7.29e-06	2018-07-01	National annual estimate[91]
–	Greenland (Denmark)	56081	7.21e-06	2020-01-01	National estimate[182]
–	Northern Mariana Islands (US)	56200	7.23e-06	2018-07-01	National annual estimate[91]
187	Marshall Islands	55500	7.14e-06	2018-07-01	National annual estimate[91]
–	South Ossetia[y]	53532	6.88e-06	2015-10-15	Preliminary 2015 census result[183]
188	Saint Kitts and Nevis	52823	6.79e-06	2019-07-01	UN projection[2]
–	Faroe Islands (Denmark)	52124	6.7e-06	2020-01-01	Monthly national estimate[184]
–	Turks and Caicos Islands (UK)	41369	5.32e-06	2018-07-01	National estimate[185]
–	Sint Maarten (Netherlands)	40614	5.22e-06	2018-01-01	National estimate[186]
189	Liechtenstein	38749	4.98e-06	2019-12-31	National semi annual estimate[187]
190	Monaco	38300	4.92e-06	2018-12-31	National annual estimate[188]
–	Saint Martin (France)	35746	4.6e-06	2016-01-01	National estimate[189]
–	Gibraltar (UK)	33701	4.33e-06	2019-07-01	UN projection[2]
191	San Marino	33574	4.32e-06	2019-12-31	National monthly estimate[190]
–	British Virgin Islands (UK)	30030	3.86e-06	2019-07-01	UN projection[2]
–	Åland Islands (Finland)	29885	3.84e-06	2020-01-31	National annual estimate[191]
192	Palau	17900	2.3e-06	2018-07-01	National annual estimate[91]
–	Cook Islands (NZ)	15200	1.95e-06	2018-07-01	National annual estimate[91]
–	Anguilla (UK)	14869	1.91e-06	2019-07-01	UN projection[2]
–	Wallis and Futuna (France)	11700	1.5e-06	2018-07-01	National annual estimate[91]
193	Nauru	11000	1.41e-06	2018-07-01	National annual estimate[91]
194	Tuvalu	10200	1.31e-06	2018-07-01	National annual estimate[91]
–	Saint Barthélemy (France)	9793	1.26e-06	2016-01-01	National estimate[192]
–	Saint Pierre and Miquelon (France)	6008	7.72e-07	2016-01-01	National estimate[193]
–	Saint Helena, Ascension	5633	7.24e-07	2016-02-07	2016 census result[194]
	and Tristan da Cunha (UK)
–	Montserrat (UK)	4989	6.41e-07	2019-07-01	UN projection[2]
–	Falkland Islands (UK)	3198	4.11e-07	2016-10-09	2016 census result[195]
–	Christmas Island (Australia)	1928	2.48e-07	2018-06-30	National estimate[196]
–	Norfolk Island (Australia)	1756	2.26e-07	2018-06-30	National estimate[196]
–	Niue (NZ)	1520	1.95e-07	2018-07-01	National annual estimate[91]
–	Tokelau (NZ)	1400	1.8e-07	2018-07-01	National annual estimate[91]
195	Vatican City	799	1.03e-07	2019-07-01	UN projection[2]
–	Cocos (Keeling) Islands (Australia)	538	6.92e-08	2018-06-30	National estimate[196]
–	Pitcairn Islands (UK)	50	6.43e-09	2019-01-01	National estimate[197]
	World	7777724000	1	2020-04-10	UN projection[198]
